# Supplementary material
Source: HighWire-hosted journal article supplement (https://bmjopen.bmj.com/content/7/12/e017450)
Supplement: inline-supplementary-material-1 [file inline-supplementary-material-1.pdf]

## Supplementary Appendix

Table S1 Missing data across confounding variables of interest

| Confounder             | Missing Observations (N) |
|------------------------|--------------------------|
| Urban                  | 0                        |
| Education              | 27                       |
| Marital status         | 4                        |
| Region                 | 0                        |
| Smoking status         | 689                      |
| Alcohol consumption    | 44                       |
| Physical activity      | 0                        |
| Diet                   | 0                        |
| Number of observations | 17329                    |

Table S2 NCD treatments among men and women in the CHARLS 2011

|                      | Men<br>n=8401 | Women<br>n=8928 | P value |
|----------------------|---------------|-----------------|---------|
| <b>Hypertension</b>  |               |                 |         |
| Chinese traditional  | 11.27%        | 12.04%          | 0.660   |
| Western modern       | 73.24%        | 73.02%          | 0.912   |
| None of the above    | 21.27%        | 19.71%          | 0.296   |
| <b>Dyslipidaemia</b> |               |                 |         |
| Chinese traditional  | 11.18%        | 16.03%          | 0.071   |
| Western modern       | 48.04%        | 44.93%          | 0.398   |
| Other treatments     | 5.40%         | 7.33%           | 0.189   |
| None of the above    | 43.24%        | 41.57%          | 0.647   |
| <b>Diabetes</b>      |               |                 |         |
| Chinese traditional  | 10.24%        | 13.15%          | 0.245   |
| Western modern       | 63.56%        | 57.75%          | 0.206   |
| Insulin injections   | 14.80%        | 9.98%           | 0.052   |
| None of the above    | 21.74%        | 29.52%          | 0.031   |
| <b>Heart Disease</b> |               |                 |         |
| Chinese traditional  | 20.23%        | 24.71%          | 0.099   |
| Western modern       | 55.97%        | 59.05%          | 0.289   |
| Other treatments     | 6.08%         | 5.10%           | 0.359   |
| None of the above    | 32.24%        | 28.46%          | 0.151   |
| <b>Stroke</b>        |               |                 |         |
| Chinese traditional  | 26.92%        | 31.73%          | 0.398   |

|                             |        |        |        |
|-----------------------------|--------|--------|--------|
| Western medicine            | 55.07% | 49.59% | 0.374  |
| Physical therapy            | 9.22%  | 8.11%  | 0.735  |
| Accupuncture                | 11.82% | 9.91%  | 0.721  |
| Occupational therapy        | 3.85%  | 2.12%  | 0.347  |
| None of the above           | 33.52% | 32.49% | 0.859  |
| <b>Chronic lung disease</b> |        |        |        |
| Chinese traditional         | 15.28% | 22.63% | 0.005  |
| Western modern              | 48.65% | 55.87% | 0.030  |
| Other treatments            | 5.87%  | 10.98% | 0.001  |
| None of the above           | 42.61% | 33.06% | 0.002  |
| <b>Cancer</b>               |        |        |        |
| Chinese traditional         | 18.25% | 21.99% | 0.620  |
| Western modern              | 46.68% | 43.01% | 0.687  |
| Chemotherapy                | 24.03% | 12.44% | 0.112  |
| Surgery                     | 28.63% | 44.39% | 0.072  |
| Radiation therapy           | 7.16%  | 4.78%  | 0.525  |
| None of the above           | 28.78% | 28.96% | 0.075  |
| <b>Arthritis</b>            |        |        |        |
| Chinese traditional         | 17.02% | 20.21% | 0.010  |
| Western modern              | 33.33% | 40.56% | <0.001 |
| Other treatments            | 21.02% | 22.47% | 0.282  |
| None of the above           | 45.23% | 37.70% | <0.001 |

Categorical variables presented as weighted percentage adjusted for age. Differences in categorical variables were explored by Chi-square test.
